# Supplementary material for: The Patient Experience of Recovery Following Anti-NMDA Receptor Encephalitis: A Qualitative Content Analysis
Source: Atypon-hosted journal article supplement (doi:10.1176/appi.neuropsych.20030049), 2020-09-02
Supplement: appi.neuropsych.20030049.ds001.pdf [file appi.neuropsych.20030049.ds001.pdf]

## ***Supplementary Materials 1***

### ***Interview schedule***

Question 1: **“Please tell me about your recovery from encephalitis?”**

- Prompt for time frames
- Return to pre-illness state,
- Changes in mental or physical health
- Change in function and wellbeing

Question 2: **“How have you adjusted to accommodate your recovery?”**

- Probe for changes made to manage any identified ongoing problems, in reference to any problems identified:
  - “How have they affected your lifestyle?”
    - Probe for impact in various domains (work, family life, social activities, activities of daily living)
  - “What has helped your recovery?”
    - Probe for support/ accommodations needed to support adaptation.

Global rating: **“How would you rate your recovery on a scale of 1-10?”**

- (1 worst – 10 best)

## *Supplementary Materials 2*

### *Participant's unprompted recall\* of acute phase symptoms of anti-NMDA receptor encephalitis (N=7)*

| <b>Grouping</b>      | <b>n</b> | <b>Type</b>            | <b>n</b> |
|----------------------|----------|------------------------|----------|
| <b>Physical</b>      | 6        | Immobility             | 3        |
|                      |          | Insomnia               | 2        |
|                      |          | Cardiac                | 1        |
|                      |          | Fatigue                | 1        |
|                      |          | Gastroparesis          | 1        |
|                      |          | Incontinence           | 1        |
|                      |          | Sensory loss           | 1        |
|                      |          | Weakness               | 1        |
| <b>Cognitive</b>     | 4        | Confusion              | 3        |
|                      |          | Dissociation           | 2        |
|                      |          | Perceptual disturbance | 2        |
| <b>Behavioural</b>   | 4        | Bizarre behaviour      | 2        |
|                      |          | Self-care (incapacity) | 1        |
| <b>Psychological</b> | 3        | Anger                  | 1        |
|                      |          | Anxiety                | 1        |
|                      |          | Delusional thinking    | 1        |
|                      |          | Hallucinations         | 1        |
|                      |          | Nightmares             | 1        |
| <b>Communication</b> | 2        | Perseveration          | 1        |
|                      |          | Intonation (change)    | 1        |

\* No questions relating the recollection of acute phase symptoms were included in the interview schedule however these spontaneously emerged. The information presented in this table includes symptoms mentioned by the interviewees as being associated with the acute phase. Note that two participants referred to 'catatonia' without further elaboration as to the specific nature of the associated symptoms.
